# Supplementary material for: Flexible nanosheets for plasmonic photocatalysis: microwave-assisted organic synthesis of Ni–NiO@Ni2CO3(OH)2 core–shell@sheet hybrid nanostructures
Source: Royal Society of Chemistry journal article supplement (doi:10.1039/d3na00583f), 2023-01-01
Supplement: d3na00583f1.pdf [file d3na00583f1.pdf]

## Supplementary information

### **Flexible Nanosheets for Plasmonic Photocatalysis: Microwave-Assisted Organic Synthesis of Ni-NiO@Ni<sub>2</sub>CO<sub>3</sub>(OH)<sub>2</sub> Core-Shell@Sheet Hybrid Nanostructure**

Ekta Rani<sup>1</sup>, Parisa Talebi<sup>1</sup>, Terhi Pulkkinen<sup>1</sup>, Vladimir Pankratov<sup>2</sup>, Harishchandra Singh<sup>1\*</sup>

<sup>1</sup>*Nano and Molecular Systems Research Unit, University of Oulu, FIN-90014, Finland*

<sup>2</sup>*Institute of Solid-State Physics, University of Latvia, 8 Kengaraga iela, 1063 Riga, Latvia*

\*Corresponding author: [Harishchandra.Singh@oulu.fi](mailto:Harishchandra.Singh@oulu.fi)

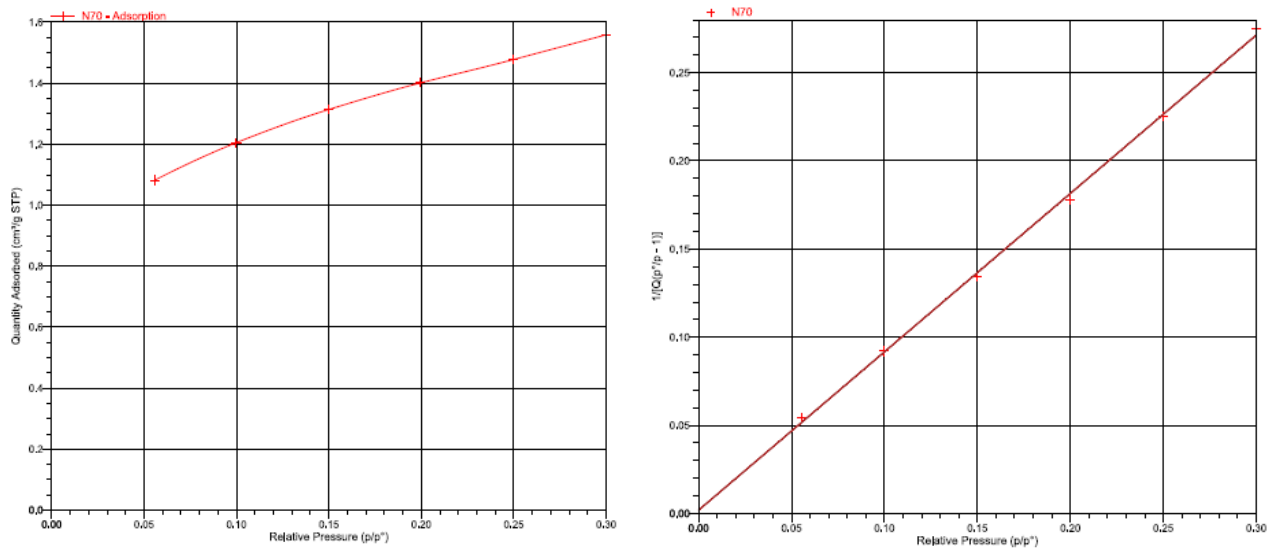

Fig. S1 (a) N<sub>2</sub> adsorption–desorption isotherm and (b) BET surface area plot of N70.

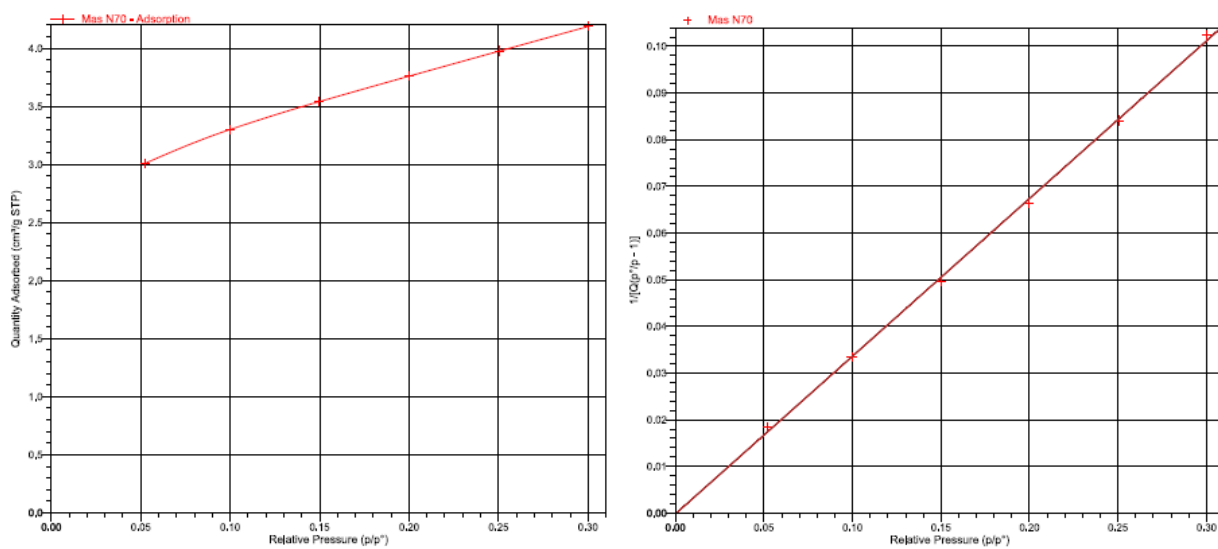

Fig. S2 (a) N<sub>2</sub> adsorption–desorption isotherm and (b) BET surface area plot of MAS-N70.
